# Supplementary material for: Endovascular Biopsy: In Vivo Cerebral Aneurysm Endothelial Cell Sampling and Gene Expression Analysis
Source: Springer Nature journal article supplement (doi:10.1007/s12975-017-0560-4), 2017-09-13
Supplement: MOESM2 [file 15056514]

| | **Supplementary Table 1: Multi-predictor Linear Mixed Model Results from Triple-positive Cells** | | | | | | | | | | | --- | --- | --- | --- | --- | --- | --- | --- | --- | --- | |  |  | **History of smoking** | | **Rupture effect in aneurysmal cells** | | **Aneurysm versus iliac location** | | **Interaction of rupture and location** | | |  |  | | **Gene** | **Gene group** | **FC** | **p-value** | **FC** | **p-value** | **FC** | **p-value** | **FC** | **p-value** | | ACE | angiogenesis | 1.777 | 0.311 | 0.301 | 0.169 | 1.580 | 0.276 | 0.525 | 0.436 | | ACTG2 | cell identification | 3.338 | 0.053 | 2.303 | 0.361 | 1.551 | 0.300 | 3.346 | 0.147 | | ALOX5 | angiogenesis | 0.036 | 0.108 | 0.050 | 0.155 | 1.040 | 0.911 | 0.561 | 0.404 | | ANGPT1 | angiogenesis | 1.278 | 0.529 | 0.349 | 0.224 | 0.940 | 0.901 | 0.941 | 0.949 | | ANGPT2 | angiogenesis | **2.967** | **0.043** | 1.126 | 0.895 | 0.629 | 0.310 | 1.800 | 0.512 | | CAT | angiogenesis | 0.507 | 0.129 | 1.078 | 0.932 | 0.722 | 0.495 | 1.716 | 0.562 | | CCL2 | inflammation | 0.074 | 0.056 | 0.173 | 0.233 | **0.453** | **0.037** | 1.558 | 0.555 | | CD34 | cell identification | 1.955 | 0.058 | 0.781 | 0.558 | 1.076 | 0.624 | 0.644 | 0.137 | | CD44 | angiogenesis | 2.608 | 0.148 | 3.554 | 0.156 | 1.531 | 0.264 | 2.849 | 0.164 | | ENG | cell identification | 0.661 | 0.115 | 0.511 | 0.140 | 1.242 | 0.357 | **0.295** | **0.008** | | EphB2 | cell identification | 3.635 | 0.057 | 0.691 | 0.692 | 1.127 | 0.771 | 2.512 | 0.255 | | EphB4 | cell identification | 0.674 | 0.315 | 0.563 | 0.364 | 1.682 | 0.098 | 0.587 | 0.388 | | FLT1 | cell identification | **3.897** | **0.004** | 0.765 | 0.568 | 1.030 | 0.567 | 1.070 | 0.505 | | FN1 | ECMM | 1.603 | 0.105 | 0.907 | 0.779 | 1.139 | 0.286 | 0.995 | 0.983 | | HIF1A | angiogenesis | 2.197 | 0.139 | 0.884 | 0.815 | 1.027 | 0.621 | 1.137 | 0.236 | | ICAM1 | inflammation | 2.160 | 0.064 | 1.096 | 0.883 | 1.262 | 0.432 | 1.881 | 0.278 | | IL6 | inflammation | 0.176 | 0.111 | **0.054** | **0.017** | 0.945 | 0.877 | 0.529 | 0.374 | | IL8 | inflammation | 4.460 | 0.051 | 0.814 | 0.826 | 1.075 | 0.834 | 1.223 | 0.770 | | ITGA7 | ECMM | 0.845 | 0.823 | 0.691 | 0.758 | 0.383 | 0.104 | 3.561 | 0.274 | | KDR | cell identification | **4.462** | **0.017** | 0.796 | 0.809 | 1.032 | 0.943 | 2.294 | 0.342 | | MCAM | cell identification | 0.477 | 0.143 | 1.184 | 0.787 | 1.046 | 0.849 | 1.529 | 0.365 | | MMP14 | ECMM | **0.020** | **0.002** | 0.348 | 0.499 | 0.987 | 0.983 | 1.115 | 0.924 | | MMP2 | ECMM | **0.108** | **0.007** | **0.077** | **0.015** | 0.570 | 0.183 | **0.088** | **0.004** | | MMP9 | ECMM | **3.411** | **0.034** | 0.558 | 0.504 | 0.890 | 0.778 | 1.505 | 0.616 | | NOS3 | inflammation | 1.784 | 0.398 | 0.507 | 0.469 | 1.105 | 0.805 | 1.471 | 0.630 | | NR4A1 | angiogenesis | 0.225 | 0.280 | 0.082 | 0.093 | 1.207 | 0.625 | 0.553 | 0.438 | | PCNA | angiogenesis | 2.380 | 0.103 | 0.608 | 0.358 | 1.019 | 0.835 | 1.057 | 0.761 | | PECAM1 | cell identification | 0.404 | 0.058 | **0.271** | **0.021** | 0.989 | 0.954 | 0.520 | 0.091 | | PPL | ECMM | 2.194 | 0.730 | 0.075 | 0.259 | 1.147 | 0.690 | 1.219 | 0.772 | | PTGS1 | inflammation | 0.116 | 0.169 | 0.201 | 0.349 | 0.524 | 0.176 | 2.101 | 0.432 | | PTGS2 | inflammation | 2.769 | 0.060 | 0.781 | 0.699 | 1.121 | 0.607 | 0.892 | 0.794 | | PTPRC | cell identification | 1.287 | 0.604 | 0.598 | 0.511 | 1.316 | 0.479 | 1.491 | 0.600 | | SCEL | ECMM | 1.387 | 0.658 | 0.967 | 0.973 | 1.421 | 0.410 | 1.626 | 0.563 | | SELP | inflammation | 0.728 | 0.750 | 0.196 | 0.163 | 1.174 | 0.685 | 0.332 | 0.159 | | SERPINE1 | ECMM | 0.376 | 0.246 | 0.370 | 0.372 | 0.453 | 0.087 | 0.258 | 0.138 | | SGK1 | angiogenesis | 0.170 | 0.443 | 0.080 | 0.277 | 0.735 | 0.329 | 1.328 | 0.650 | | TBXAS1 | inflammation | 3.310 | 0.070 | 3.065 | 0.218 | 1.101 | 0.809 | 3.261 | 0.132 | | TEK | cell identification | **1.769** | **0.048** | 1.639 | 0.354 | 1.164 | 0.593 | 1.621 | 0.384 | | TGFB1 | angiogenesis | **8.642** | **0.007** | 3.790 | 0.140 | 0.670 | 0.157 | 2.395 | 0.118 | | THBD | cell identification | 0.254 | 0.386 | 0.103 | 0.166 | 0.816 | 0.554 | 0.715 | 0.623 | | TIE1 | cell identification | 0.514 | 0.101 | **0.183** | **0.019** | 0.800 | 0.559 | **0.180** | **0.022** | | TIMP1 | ECMM | 0.769 | 0.592 | **0.177** | **0.025** | 0.712 | 0.366 | 0.287 | 0.091 | | TIMP2 | ECMM | **4.240** | **0.005** | 0.877 | 0.840 | 1.397 | 0.192 | 0.631 | 0.363 | | TNC | ECMM | 2.871 | 0.083 | 0.568 | 0.497 | 1.291 | 0.481 | 1.055 | 0.940 | | TNF | ECMM | 0.925 | 0.762 | 0.580 | 0.339 | 1.147 | 0.673 | 0.917 | 0.891 | | VCAM1 | inflammation | 0.551 | 0.069 | 0.856 | 0.831 | 1.431 | 0.387 | 1.760 | 0.482 | | VEGFA | angiogenesis | **27.680** | **0.006** | 0.511 | 0.609 | 0.787 | 0.499 | **0.159** | **0.009** | | VWF | cell identification | **0.075** | **0.038** | 0.096 | 0.113 | 1.142 | 0.796 | **0.098** | **0.021** | | Abbreviations: FC, fold change; ECMM, extracellular matrix maintenance. The interaction term compares the differences in expression levels of aneurysmal cells and iliac cells between ruptured and unruptured subjects. Results with p-values less than 0.05 are in bold. | | | | | | | | | | | | |
| --- | --- | --- | --- | --- | --- | --- | --- | --- | --- | --- | --- | --- | --- | --- | --- | --- | --- | --- | --- | --- | --- | --- | --- | --- | --- | --- | --- | --- | --- | --- | --- | --- | --- | --- | --- | --- | --- | --- | --- | --- | --- | --- | --- | --- | --- | --- | --- | --- | --- | --- | --- | --- | --- | --- | --- | --- | --- | --- | --- | --- | --- | --- | --- | --- | --- | --- | --- | --- | --- | --- | --- | --- | --- | --- | --- | --- | --- | --- | --- | --- | --- | --- | --- | --- | --- | --- | --- | --- | --- | --- | --- | --- | --- | --- | --- | --- | --- | --- | --- | --- | --- | --- | --- | --- | --- | --- | --- | --- | --- | --- | --- | --- | --- | --- | --- | --- | --- | --- | --- | --- | --- | --- | --- | --- | --- | --- | --- | --- | --- | --- | --- | --- | --- | --- | --- | --- | --- | --- | --- | --- | --- | --- | --- | --- | --- | --- | --- | --- | --- | --- | --- | --- | --- | --- | --- | --- | --- | --- | --- | --- | --- | --- | --- | --- | --- | --- | --- | --- | --- | --- | --- | --- | --- | --- | --- | --- | --- | --- | --- | --- | --- | --- | --- | --- | --- | --- | --- | --- | --- | --- | --- | --- | --- | --- | --- | --- | --- | --- | --- | --- | --- | --- | --- | --- | --- | --- | --- | --- | --- | --- | --- | --- | --- | --- | --- | --- | --- | --- | --- | --- | --- | --- | --- | --- | --- | --- | --- | --- | --- | --- | --- | --- | --- | --- | --- | --- | --- | --- | --- | --- | --- | --- | --- | --- | --- | --- | --- | --- | --- | --- | --- | --- | --- | --- | --- | --- | --- | --- | --- | --- | --- | --- | --- | --- | --- | --- | --- | --- | --- | --- | --- | --- | --- | --- | --- | --- | --- | --- | --- | --- | --- | --- | --- | --- | --- | --- | --- | --- | --- | --- | --- | --- | --- | --- | --- | --- | --- | --- | --- | --- | --- | --- | --- | --- | --- | --- | --- | --- | --- | --- | --- | --- | --- | --- | --- | --- | --- | --- | --- | --- | --- | --- | --- | --- | --- | --- | --- | --- | --- | --- | --- | --- | --- | --- | --- | --- | --- | --- | --- | --- | --- | --- | --- | --- | --- | --- | --- | --- | --- | --- | --- | --- | --- | --- | --- | --- | --- | --- | --- | --- | --- | --- | --- | --- | --- | --- | --- | --- | --- | --- | --- | --- | --- | --- | --- | --- | --- | --- | --- | --- | --- | --- | --- | --- | --- | --- | --- | --- | --- | --- | --- | --- | --- | --- | --- | --- | --- | --- | --- | --- | --- | --- | --- | --- | --- | --- | --- | --- | --- | --- | --- | --- | --- | --- | --- | --- | --- | --- | --- | --- | --- | --- | --- | --- | --- | --- | --- | --- | --- | --- | --- | --- | --- | --- | --- | --- | --- | --- | --- | --- | --- | --- | --- | --- | --- | --- | --- | --- | --- | --- | --- | --- | --- | --- | --- | --- | --- | --- | --- | --- | --- | --- | --- | --- | --- | --- | --- | --- | --- | --- | --- | --- | --- | --- | --- | --- | --- | --- | --- | --- | --- | --- | --- | --- | --- | --- | --- | --- | --- | --- | --- | --- | --- | --- | --- | --- | --- | --- | --- | --- | --- | --- | --- | --- | --- | --- | --- | --- | --- | --- | --- | --- | --- | --- | --- | --- | --- | --- | --- | --- | --- | --- |
